# Supplementary material
Source: ML conference proceedings conference paper supplement (https://openaccess.thecvf.com/content/ICCV2021/html/Klopp_Online-Trained_Upsampler_for_ICCV_2021_paper.html)
Supplement: Supplementary file 1 [file Klopp_Online-Trained_Upsampler_for_ICCV_2021_supplemental.pdf]

# Online-trained Upsampler for Deep Low Complexity Video Compression

## —Supplementary Material—

Jan P. Klopp  
National Taiwan University  
kloppjp@gmail.com

Keng-Chi Liu  
Taiwan AI Labs  
calvin89029@gmail.com

Shao-Yi Chien Liang-Gee Chen  
National Taiwan University  
sychien@ntu.edu.tw lgchen@ntu.edu.tw

## 7. Additional Results

### 7.1. Convergence Ablation

While fast encoding is not critical in offline encoding (e.g. as performed for video on demand), it can reduce resource usage and enable high latency online encoding (e.g. non-responsive content like sports events). Fig. 10 shows coding gain as a function of the training iterations. The graphs are annotated with the average use of a pixel as training data (at 100%, a pixel is seen once during training on average). As all datasets receive the same optimisation, this only depends on the frame size. For high resolutions, this number drops far below 100% for 250 iterations. Nevertheless, the gains drop only moderately, especially for the JVET A dataset. This observation indicates local generalisation that at least holds for data in the temporal/spatial vicinity of the training data. Hence even with few training cycles, the coding gains are still significant.

### 7.2. Generalisation Ablation

Due to space constraints, the generalisation ablation for 128 frames did not fit in the main paper and can be found in Fig. 11. Like the results for 32 frames in the main paper, one can observe that halving the number of frames available for training does not severely impact the coding gain.

### 7.3. Gain Distribution over Rate and Distortion

If our method mainly improved sequences with a high PSNR at a low data rate (i.e., low bandwidth demand), this may show great improvements but not translate into bandwidth reduction in practice. This issue depends on the distribution of sequences within a dataset. Figures 12, 13,

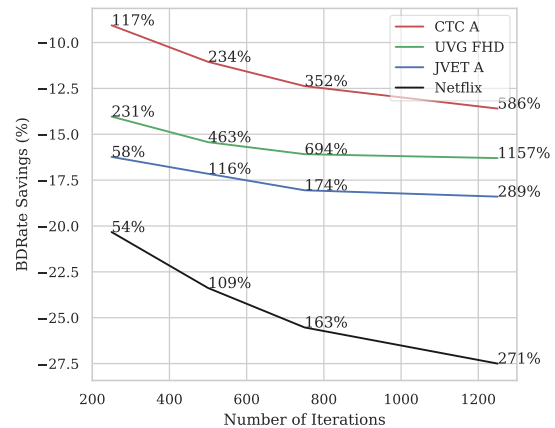

Figure 10. BDRate savings over number of optimisation iterations spent on one group of 32 pictures. Percentages indicate the amount of training pixels over the total number of pixels in a group.

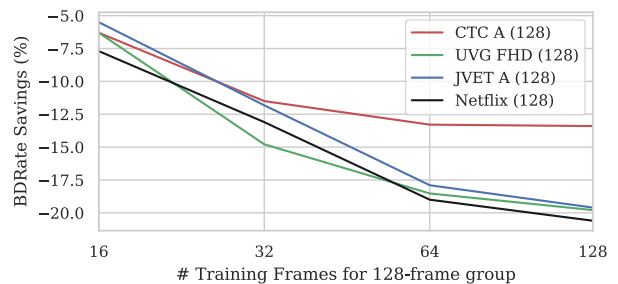

Figure 11. BDRate savings over the number of frames available for training in each group of pictures. Frames are taken from the beginning of the group. The group size is 128 frames.

and 14 show the rate saving distribution over rate and PSNR for the remaining three quality steps (the one for QP=22 is in the main paper). Sequences in the bottom right corner are likely to be more challenging to encode efficiently as their PSNR is low while their rates are high. Their rates are almost an order of magnitude above the majority on the left-hand side. Similar to the graphic in the main paper, the gains provided by our algorithm do not follow any obvious distribution, and high bandwidth sequences do also achieve high gains.

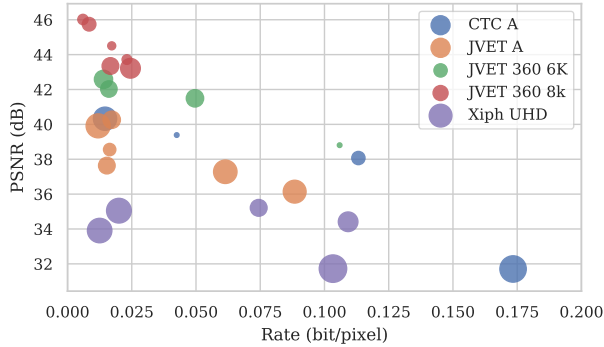

Figure 12. Distribution of rate savings over rate and distortion at test QP 27 (QP 22 for the underlying low resolution codec). Savings are indicated by the radius of each blob.

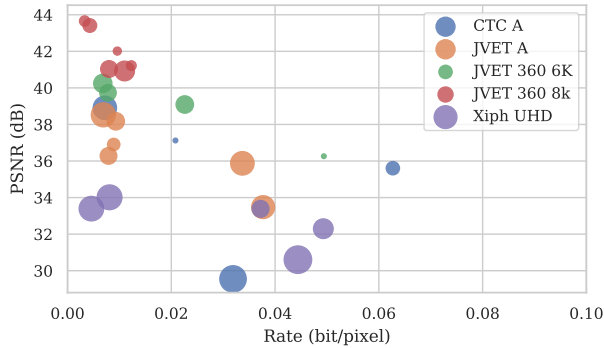

Figure 13. Distribution of rate savings over rate and distortion at test QP 32 (QP 27 for the underlying low resolution codec). Savings are indicated by the radius of each blob.

#### 7.4. Average Rate Shares

In addition to the results in the main paper, Table 8 shows the average rate share of the network’s parameters for other datasets. The dataset for which this data was presented in the main paper (UVG FHD) contains more low bandwidth sequences, not only due to the lower resolution but also because the content is simpler (less motion and texture in some sequences). The results presented here show that even under low-quality conditions, our algorithm’s overhead re-

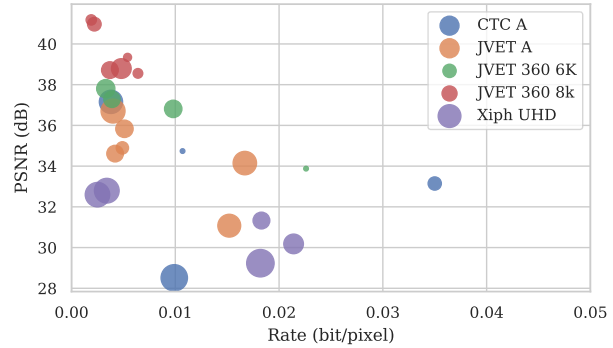

Figure 14. Distribution of rate savings over rate and distortion at test QP 37 (QP 32 for the underlying low resolution codec). Savings are indicated by the radius of each blob.

mains in the single-digit range, hardly exceeding 3% for offline encoded sequences.

Table 8. Average rate share for different datasets, given for each QP of the conventional codec that encodes the low resolution signal. The zero-latency data refers to a signalling interval of 16 frames.

| Dataset     | Offline | Zero Lat. | 17   | 22   | 27   | 32   |
|-------------|---------|-----------|------|------|------|------|
| JVET A      | ✓       |           | 0.4% | 0.7% | 1.2% | 2.2% |
| CTC A       | ✓       |           | 0.4% | 0.8% | 1.6% | 3.1% |
| JVET 360 6K | ✓       |           | 0.3% | 0.5% | 1.3% | 2.2% |
| JVET 360 8K | ✓       |           | 0.3% | 0.5% | 1.0% | 2.0% |
| Xiph UHD    | ✓       |           | 0.2% | 0.4% | 0.9% | 1.9% |
| JVET A      |         | ✓         | 0.5% | 1.2% | 2.3% | 4.4% |
| CTC A       |         | ✓         | 0.4% | 1.2% | 3.0% | 7.1% |

#### 7.5. LPIPS

Learned Perceptual Image Patch Similarity [46] has been proposed as a learned metric for image fidelity. The metric has been tuned according to feedback from human raters viewing an original and a distorted image. Various kinds of noise have been applied to the original image, among them also JPEG compression. Table 9 shows the results of testing LPIPS on the PSNR-trained models, i.e. without tuning to the LPIPS metric, for three datasets. The results show similar or even higher improvements than testing on PSNR, indicating that our PSNR/MS-SSIM results are not overfitting to the particular metric. A simple intuition is that our method uses comparably few parameters to perform upsampling. Hence overfitting to a metric may be less likely than with more complex methods.

#### 8. Quantisation

The number of bits reserved for weights ( $Q_w$ ) and bias ( $Q_b$ ) decreases with decreasing quality, i.e. increasing

Table 9. Bjontegaard Deltas for Rate and Distortion as measured by PSNR and LPIPS over x265 with tune `psnr`. LPIPS measures were obtained by optimising for PSNR (i.e. MSE). Negative rate savings indicate that our method requires fewer bits of code to deliver the same quality. All quality measures are taken in dB, LPIPS was converted to log scale (decibel) as follows:  $LPIPS_{dB} = -10.0 \log(LPIPS)$

|         | PSNR          |               | LPIPS         |                |
|---------|---------------|---------------|---------------|----------------|
|         | $\Delta$ Rate | $\Delta$ PSNR | $\Delta$ Rate | $\Delta$ LPIPS |
| CTC A   | -13.6%        | +0.2954       | -11.5%        | +0.0295        |
| JVET A  | -18.4%        | +0.4813       | -25.6%        | +0.4059        |
| UVG FHD | -16.3%        | +0.5156       | -34.8%        | +0.6175        |

quantisation parameter  $q$  as listed in Tab. 10.

Table 10. Quantisation bitdepth for weights and bias depending on quantisation parameter  $q$ .

| QP $q$              | $Q_w$ | $Q_b$ |
|---------------------|-------|-------|
| $q \leq 20$         | 12    | 10    |
| $20 \leq q \leq 25$ | 11    | 9     |
| $25 \leq q \leq 30$ | 10    | 8     |
| $30 \leq q$         | 9     | 8     |

## 9. Pre-Training

Figure 15 displays the concept of pre-training exploited in our work in a simplified manner.

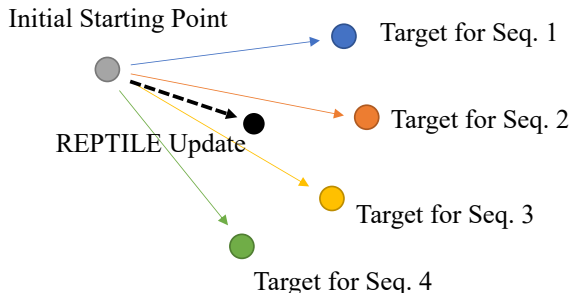

Figure 15. Simplified schematic of the behaviour of NN parameters in the pre-training process. By averaging the parameter updates (coloured arrows) for several different sequences a better initial starting point is reached (black dashed arrow). This new starting point is then used for a different sequence (i.e. not sequences 1 to 4) to obtain an objective measurement of the impact of REPTILE.

## 10. Algorithms

This section lists the algorithms we used to make reproduction easier and allow for a more detailed understanding. Table 11 lists the relative resolutions (with respect to the

Table 11. Resolutions relative to the resolution of the original sequence.

| Variable                  | Symbol          | Relative Resolution |
|---------------------------|-----------------|---------------------|
| Original sequence         | $x$             | $1 \times 1$        |
| Bilinear downsampled seq. | $x_{1/2}$       | $1/2 \times 1/2$    |
| Reconstructed downs. seq. | $\hat{x}_{1/2}$ | $1/2 \times 1/2$    |
| Internal features         | $z_{int}$       | $1/4 \times 1/4$    |
| Encoded int. feat.        | $z_{Enc}$       | $1/2 \times 1/2$    |
| Absolute positions        | $p_{Abs}$       | $1/2 \times 1/2$    |
| Encoded positions         | $p_{Enc}$       | $1/2 \times 1/2$    |
| Attention weightings      | $z_{Att}$       | $1/2 \times 1/2$    |
| Reconstructed sequence    | $\hat{x}$       | $1 \times 1$        |

original sequence) for most variables used throughout the paper and the algorithm listings. Algorithm 1 contains the main steps for the encoding and the decoding procedure on a high level. Algorithm 2 describes in detail all steps required to compute the inference through the proposed network architecture. Algorithm 3 contains the training and quantisation procedures. The pre-training is listed in Algorithm 4. Lastly, Algorithm 5 describes the position encoding process.

## 11. Network Architectures

In this section, we list the network architecture for  $f_{Feat}$ ,  $f_{Pos}$ , and  $f_{Denoise}$  in Tables 12, 13, and 14, respectively. Also, Tables 15 and 16 describe the network architecture used in the comparison with [16].

---

**Algorithm 1: Encoding & Decoding Procedure.**

---

**Result:** Network parameters  $\Theta$ , reconstruction  $\hat{X}$ ,  
Conventional code  $Y_{1/2}$   
**Input:** Conventional codec  $C$ , quantisation parameter  
 $q$ , hyperparameters  $\gamma$ , image sequence  $x$ ,  
length of a frame group  $N_{\text{Frame}}$

```
1 # — Encode —
2  $\Theta \leftarrow \emptyset$  # CNN parameters
3  $Y_{1/2} \leftarrow \emptyset$  # Conventional code
4 if  $\theta_{\text{init}}$  not yet available then
5 |  $\theta_{\text{init}} \leftarrow \text{PreTrain}(\dots)$  # Algorithm 4
6 end
7 foreach frame group  $i$  do
8 | #  $i$ : indices to all frames in the frame group
9 |  $x_{1/2} \leftarrow \text{BilinRescale}(x[i], 0.5)$  # Resize
10 |  $y_{1/2} \leftarrow C_{\text{Enc}}(x_{1/2}, q)$  # Conventional encoding
11 |  $\hat{x}_{1/2}, z_{\text{int}} \leftarrow C_{\text{Dec}}(y_{1/2})$  # Rec. & Internal Signal
12 |  $\theta_q \leftarrow \text{Training}(x[i], \hat{x}_{1/2}, z_{\text{int}}, \gamma, \theta_{\text{init}})$  #
    | Algorithm 3
13 |  $\Theta \leftarrow \Theta \cup \theta_q$ 
14 |  $Y_{1/2} \leftarrow Y_{1/2} \cup y_{1/2}$ 
15 end
16 # — Decode —
17  $\hat{X} \leftarrow \emptyset$  # Reconstruction
18 foreach  $(\theta_q, y_{1/2}) \in (\Theta, Y_{1/2})$  do
19 |  $\hat{x}_{1/2}, z_{\text{int}} \leftarrow C_{\text{Dec}}(y_{1/2})$  # Rec. & Internal Signal
20 |  $\hat{x} \leftarrow \text{Inference}(\hat{x}_{1/2}, z_{\text{int}}; \theta_q)$  # Algorithm 2
21 |  $\hat{X} \leftarrow \hat{X} \cup \hat{x}$ 
22 end
```

---

---

**Algorithm 2: Network Inference.**

---

**Result:** Output  $\hat{x}$  of resolution  $H \times W$

**Input:** Network parameters  $\theta$ , low resolution  
reconstruction  $\hat{x}_{1/2}$ , internal signals  $z_{\text{int}}$

```
1 # Prepare Input: Upsample U,V to  $H/2 \times W/2$ 
2  $\hat{x}_{\text{in},Y} \leftarrow \hat{x}_{1/2,Y}$ 
3  $\hat{x}_{\text{in},U} \leftarrow \text{BilinRescale}(\hat{x}_{1/2,U}, 2.0)$ 
4  $\hat{x}_{\text{in},V} \leftarrow \text{BilinRescale}(\hat{x}_{1/2,V}, 2.0)$ 
5 # Prepare encoded positions (Algorithm 5)
6  $(\Omega_t, \Phi_t) \leftarrow \theta_{\text{Temp}}$  # Temporal frequencies/phases
7  $(\Omega_s, \Phi_s) \leftarrow \theta_{\text{Spat}}$  # Spatial frequencies/phases
8  $p_{\text{Enc}} \leftarrow \text{PosEnc}(H/2, W/2, \Omega_t, \Phi_t, \Omega_s, \Phi_s)$ 
9 # Process internal features
10  $z_{\text{Enc}} \leftarrow f_{\text{Feat}}(z_{\text{int}}; \theta_{\text{Feat}})$ 
11 # Prepare input for attention network
12  $z_{\text{Att}} \leftarrow f_{\text{Pos}}(\text{concat}(z_{\text{Enc}}, p_{\text{Enc}}; \text{dim}=1); \theta_{\text{Pos}})$ 
13 # Compute the Denoiser's output
14 # Resolution here is  $H/2, W/2$ 
15  $o_{\text{Last}} \leftarrow \emptyset$  # Initialise last layer's output
16 foreach Layer  $l$  do
17 | # Provide input (layers 1, 5, 7)
18 | if  $l$  requires input then
19 | |  $o_{\text{Last}} \leftarrow \text{concat}(\hat{x}_{\text{in}}, o_{\text{Last}}; \text{dim} = 1)$ 
20 | end
21 | # Attention weighting (layer 6's input)
22 | if  $l$  requires attention then
23 | |  $o_{\text{Last}} \leftarrow o_{\text{Last}} \odot \text{sigmoid}(z_{\text{Att}})$ 
24 | end
25 |  $o_{\text{Last}} \leftarrow f_{\text{Denoise, Layer}=l}(o_{\text{Last}}; \theta_{\text{Denoise, Layer}=l})$ 
26 end
27 # Split output (channels 1-4  $\rightarrow Y$ , 5  $\rightarrow U$ , 6  $\rightarrow V$ )
28  $o_Y, o_U, o_V \leftarrow \text{split}(o_{\text{Last}}; [1, 2, 3, 4], [5], [6])$ 
29 # Unshuffle  $Y$  from the channel to spatial dimension
30  $o_Y \leftarrow \text{depth2space}(o_Y; [2, 2])$ 
31 # Resolution of  $o_Y$  is now:  $H \times W$ 
32 # Compute the final output
33  $\hat{x}_Y \leftarrow \text{BilinRescale}(\hat{x}_{1/2,Y}, 2.0) + o_Y$ 
34  $\hat{x}_U \leftarrow \text{BilinRescale}(\hat{x}_{1/2,U}, 2.0) + o_U$ 
35  $\hat{x}_V \leftarrow \text{BilinRescale}(\hat{x}_{1/2,V}, 2.0) + o_V$ 
```

---

---

**Algorithm 3: Network Training.**

---

**Result:** Quantised network parameters  $\theta_q$

**Input:** Initial network parameters  $\theta_{\text{Init}}$ , target  $x$ , low resolution reconstruction  $\hat{x}_{1/2}$ , internal signals  $z_{\text{int}}$ , hyper parameters  $\gamma$ , loss function  $\mathcal{L}$

```
1  $\theta_t \leftarrow \theta_{\text{Init}}$ 
2 for  $\gamma_{\text{iter}}$  iterations do
3    $x_b, \hat{x}_{1/2,b}, z_{\text{int},b} \leftarrow$ 
     SamplePatches( $x, \hat{x}_{1/2}, z_{\text{int}}; \gamma_{\text{patchSize}}, \gamma_{\text{batchSize}}$ )
4    $\hat{x}_b \leftarrow$  Inference( $\hat{x}_{1/2,b}, z_{\text{int},b}; \theta_t$ ) # Algorithm 2
5    $\theta_t \leftarrow$  Adam( $\frac{\partial \mathcal{L}}{\partial \theta}(x_b, \hat{x}_b); \gamma_{\text{lr}}$ )
6 end
7 # Quantise  $\theta_t$ 
8  $\theta^q \leftarrow \emptyset$ 
9 # Iterate over all layers in all networks
10 foreach layer  $l$  do
11   # Remove batch normalisation (before conv)
12   # Only filter index  $f$  and channel index  $c$  shown
13    $w'_{f,c} \leftarrow \frac{w_{f,c}}{\sigma_c}$ 
14    $b'_f \leftarrow b_f - \sum_c \frac{w_{f,c} \mu_c}{\sigma_c}$ 
15   #  $Q_w$  bits for weights,  $Q_b$  for bias (see Tab. 10)
16    $Q_w, Q_b \leftarrow \gamma_{\text{Quant}}$ 
17   # Value ranges
18    $r_w \leftarrow 2^{Q_w-1} - 1$ 
19    $r_b \leftarrow 2^{Q_b-1} - 1$ 
20   # Weight quantisation per channel:
21    $\alpha_c \leftarrow \text{round}\left(\frac{r_w}{\max_k |w_{k,c}|}\right)$ 
22    $w^q_{f,c} \leftarrow \lfloor 0.5 + \frac{w'_{f,c}}{\alpha_c} \rfloor$ 
23   # Bias quantisation:
24    $\beta \leftarrow \text{round}\left(\frac{r_b}{\max_k |b'_k|}\right)$ 
25    $b^q \leftarrow \lfloor 0.5 + \frac{b'_f}{\beta} \rfloor$ 
26    $\theta_q \leftarrow \theta_q \cup \{\beta, b^q\}$ 
27   foreach channel  $c$  do
28      $\theta_q \leftarrow \theta_q \cup \{\alpha_c, w^q_{f,c}\}$ 
29   end
30 end
31 # No quantisation necessary for position encoding
    parameters
32  $\theta_{\text{Temp}} \leftarrow (\Omega_t, \Phi_t)$ 
33  $\theta_{\text{Spat}} \leftarrow (\Omega_s, \Phi_s)$ 
```

---

---

**Algorithm 4: Pre-training.**

---

**Result:** Initial network parameters  $\theta_{\text{init}}$  for quantisation parameter (quality)  $q$

**Input:**  $N_{\text{Seq}}$  Sequences  $X$ , not including the sequence to be tested. Hyperparameter  $\gamma$ , quantisation parameter  $q$ ,  $N_{\text{meta}}$  meta iterations.

```
1  $\epsilon \leftarrow 0.1$  # Meta learning rate
2  $\theta_{\text{Init}} \leftarrow \text{rand}()$  # Random initialisation
3 # Random parameters don't work well for position
    encoding
4  $\theta_{\text{Temp}} \leftarrow ([0.5, 0.25], [0, 0])$  #  $(\Omega_t, \Phi_t)$ 
5  $\theta_{\text{Spat}} \leftarrow ([0.5, 0.25, 0.125], [0, 0, 0])$  #  $(\Omega_s, \Phi_s)$ 
6 for  $N_{\text{meta}}$  iterations do
7    $\theta \leftarrow 0$  # Accumulate updates
8   for  $x \in X$  do
9      $i \leftarrow$  Random frame group
10    # En-/Decode frame group  $i$ 
11     $x_{1/2} \leftarrow$  BilinRescale( $x[i], 0.5$ ) # Resize
12     $y_{1/2} \leftarrow C_{\text{Enc}}(x_{1/2}, q)$ 
13     $\hat{x}_{1/2}, z_{\text{int}} \leftarrow C_{\text{Dec}}(y_{1/2})$ 
14    # Train for 50 iterations, start with  $\theta_{\text{Init}}$ 
15     $\theta \leftarrow \theta + \text{Training}(x[i], \hat{x}_{1/2}, z_{\text{int}}, \gamma, \theta_{\text{Init}})$ 
16  end
17   $\theta_{\text{Init}} \leftarrow (1 - \epsilon) \theta_{\text{Init}} + \frac{\epsilon}{N_{\text{Seq}}} \theta$ 
18 end
```

---

---

**Algorithm 5: Position Encoding.**

---

**Result:** Encoded positions  $p_{\text{Enc}}$

**Input:** Sequence size:  $T$  frames of height  $H'$  and width  $W'$ , encoding parameters  $\Omega_t, \Phi_t$  (temporal) and  $\Omega_s, \Phi_s$  (spatial)

```
1 # Note that this happens for the down sampled
2 # sequence, hence  $H' = H/2$  and  $W' = W/2$ 
3  $p_{\text{Abs}} \leftarrow \text{zeros}(\text{size} = [T, 3, H', W'])$ 
4 # Generate normalised absolute positions with three
5 # channels for temporal and two spatial dimensions
6  $p_{\text{Abs}}[t, :, h, w] \leftarrow [\frac{t}{T}, \frac{h}{H'}, \frac{w}{W'}]$ 
7  $p_{\text{Enc}} \leftarrow \emptyset$ 
8 # Temporal encoding
9 foreach  $(\omega_t, \phi_t) \in (\Omega_t, \Phi_t)$  do
10 |    $p_{\text{sin}} \leftarrow \sin(2\pi\omega_t p_{\text{Abs}}[:, 0] + \phi_t)$ 
11 |    $p_{\text{cos}} \leftarrow \cos(2\pi\omega_t p_{\text{Abs}}[:, 0] + \phi_t)$ 
12 |    $p_{\text{Enc}} \leftarrow \text{concat}([p_{\text{Enc}}, p_{\text{sin}}, p_{\text{cos}}], \text{dim} = 1)$ 
13 end
14 # Spatial encoding
15 foreach  $(\omega_s, \phi_s) \in (\Omega_s, \Phi_s)$  do
16 |   # Vertical
17 |    $p_{\text{sin}} \leftarrow \sin(2\pi\omega_s p_{\text{Abs}}[:, 1] + \phi_s)$ 
18 |    $p_{\text{cos}} \leftarrow \cos(2\pi\omega_s p_{\text{Abs}}[:, 1] + \phi_s)$ 
19 |    $p_{\text{Enc}} \leftarrow \text{concat}([p_{\text{Enc}}, p_{\text{sin}}, p_{\text{cos}}], \text{dim} = 1)$ 
20 |   # Horizontal
21 |    $p_{\text{sin}} \leftarrow \sin(2\pi\omega_s p_{\text{Abs}}[:, 2] + \phi_s)$ 
22 |    $p_{\text{cos}} \leftarrow \cos(2\pi\omega_s p_{\text{Abs}}[:, 2] + \phi_s)$ 
23 |    $p_{\text{Enc}} \leftarrow \text{concat}([p_{\text{Enc}}, p_{\text{sin}}, p_{\text{cos}}], \text{dim} = 1)$ 
24 end
```

---

Table 12. **Feature Network.** Input are the internal features  $z_{\text{int}}$ . Resolution refers to the relative resolution with respect to the original sequence. The computational complexities are given as operations per pixel of the original size. F/W stands for inference at test time, F/W (Trn) for the inference at training time (where BatchNorm is still present). BN is the BatchNorm update where  $\mu$  and  $\sigma$  need to be computed. B/W refers to the backward computation, Grad. to the gradient computation. #W and #B are the numbers of weights and biases, respectively (BN is fused with Conv). Bias is disabled for all layers in this network. Note that the first two layers do not need to backpropagate because the input does not require a gradient.

| Layer    | Type      | Channels | Kernel       | Filters | Groups | Resolution       | F/W   | F/W (Trn) | BN   | B/W   | Grad. | #W  | #B |
|----------|-----------|----------|--------------|---------|--------|------------------|-------|-----------|------|-------|-------|-----|----|
| 1a       | BN        | 6        | 1            | 6       | 6      | $1/4 \times 1/4$ |       | 0.375     | 0.75 | 0     | 0     |     |    |
| 1b       | Conv      | 6        | 1            | 12      | 1      | $1/4 \times 1/4$ | 4.5   | 4.5       |      | 0     | 4.5   | 72  | 0  |
| 2a       | BN        | 12       | 1            | 12      | 12     | $1/4 \times 1/4$ |       | 0.75      | 1.5  | 0.75  | 0     |     |    |
| 2b       | Conv      | 12       | $3 \times 3$ | 12      | 12     | $1/4 \times 1/4$ | 6.75  | 6.75      |      | 6.75  | 6.75  | 108 | 0  |
| 3a       | BN        | 12       | 1            | 12      | 12     | $1/4 \times 1/4$ |       | 0.75      | 1.5  | 0.75  | 0     |     |    |
| 3b       | Conv      | 12       | 1            | 24      | 1      | $1/4 \times 1/4$ | 18    | 18        |      | 18    | 18    | 288 | 0  |
| 4        | Unshuffle | 24       | None         | 6       | 1      | $1/2 \times 1/2$ |       | 0         |      | 0     | 0     |     |    |
| $\Sigma$ |           |          |              |         |        |                  | 29.25 | 31.125    | 3.75 | 26.25 | 29.25 | 468 | 0  |

Table 13. **Position Network.** Input are the concatenated encoded internal features  $z_{\text{Enc}}$  and the encoded positions  $p_{\text{Enc}}$ . For the meaning of the columns, please refer to Table 12. Sigmoid is assumed to take 7 floating point operations to compute.

| Layer    | Type    | Channels | Kernel       | Filters | Groups | Resolution       | F/W   | F/W (Trn) | BN | B/W   | Grad.  | #W  | #B |
|----------|---------|----------|--------------|---------|--------|------------------|-------|-----------|----|-------|--------|-----|----|
| 1a       | BN      | 22       | 1            | 22      | 22     | $1/2 \times 1/2$ |       | 5.5       | 11 | 5.5   | 0      |     |    |
| 1b       | Conv    | 22       | 1            | 12      | 1      | $1/2 \times 1/2$ | 66    | 66        |    | 66    | 66     | 264 | 12 |
| 2a       | BN      | 12       | 1            | 12      | 12     | $1/2 \times 1/2$ |       | 3         | 6  | 3     | 0      |     |    |
| 2b       | Conv    | 12       | $3 \times 3$ | 12      | 12     | $1/2 \times 1/2$ | 27    | 27        |    | 27    | 27     | 108 | 12 |
| 3a       | BN      | 12       | 1            | 12      | 12     | $1/2 \times 1/2$ |       | 3         | 6  | 3     | 0      |     |    |
| 3b       | Conv    | 12       | 1            | 14      | 1      | $1/2 \times 1/2$ | 42    | 42        |    | 42    | 42     | 168 | 14 |
| 4a       | BN      | 14       | 1            | 14      | 14     | $1/2 \times 1/2$ |       | 3.5       | 7  | 3.5   | 0      |     |    |
| 4b       | Conv    | 14       | $3 \times 3$ | 14      | 12     | $1/2 \times 1/2$ | 36.75 | 36.75     |    | 36.75 | 36.75  | 147 | 14 |
| 5        | Sigmoid |          |              |         |        | $1/2 \times 1/2$ | 1.75  | 1.75      |    | 0.25  | 0      |     |    |
| $\Sigma$ |         |          |              |         |        |                  | 173.5 | 188.5     | 30 | 187   | 171.75 | 687 | 52 |

Table 14. **Denoiser Network.** Input are the low resolution reconstruction  $\hat{x}_{1/2}$  (concatenated before layers 5a and 7a). Layer 5c is the attention weighting layer, which has the same complexity as BatchNorm. For the meaning of the columns, please refer to Table [12](#)

| Layer    | Type     | Channels | Kernel       | Filters | Groups | Resolution       | F/W  | F/W (Trn) | BN   | B/W    | Grad. | #W   | #B  |
|----------|----------|----------|--------------|---------|--------|------------------|------|-----------|------|--------|-------|------|-----|
| 1a       | BN       | 3        | 1            | 3       | 3      | $1/2 \times 1/2$ |      | 0.75      | 1.5  | 0      | 0     |      |     |
| 1b       | Conv     | 3        | 1            | 14      | 1      | $1/2 \times 1/2$ | 10.5 | 10.5      |      | 0      | 10.5  | 42   | 14  |
| 2a       | BN       | 14       | 1            | 14      | 14     | $1/2 \times 1/2$ |      | 3.5       | 7    | 3.5    | 0     |      |     |
| 2b       | Conv     | 14       | $3 \times 3$ | 14      | 14     | $1/2 \times 1/2$ | 31.5 | 31.5      |      | 31.5   | 31.5  | 126  | 14  |
| 3a       | BN       | 14       | 1            | 14      | 14     | $1/2 \times 1/2$ | 0    | 3.5       | 7    | 3.5    | 0     |      |     |
| 3b       | Conv     | 14       | 1            | 14      | 1      | $1/2 \times 1/2$ | 49   | 49        |      | 49     | 49    | 196  | 14  |
| 4a       | BN       | 14       | 1            | 14      | 14     | $1/2 \times 1/2$ |      | 3.5       | 7    | 3.5    | 0     |      |     |
| 4b       | Conv     | 14       | $3 \times 3$ | 14      | 14     | $1/2 \times 1/2$ | 31.5 | 31.5      |      | 31.5   | 31.5  | 126  | 14  |
| 5a       | BN       | 17       | 1            | 17      | 17     | $1/2 \times 1/2$ |      | 4.25      | 8.5  | 0      | 0     |      |     |
| 5b       | Conv     | 17       | 1            | 14      | 1      | $1/2 \times 1/2$ | 59.5 | 59.5      |      | 59.5   | 59.5  | 238  | 14  |
| 5c       | Hadamard | 14       | 1            | 14      | 14     | $1/2 \times 1/2$ | 3.5  | 3.5       |      | 0      | 0     |      |     |
| 6a       | BN       | 14       | 1            | 14      | 14     | $1/2 \times 1/2$ |      | 3.5       | 7    | 3.5    | 0     |      |     |
| 6b       | Conv     | 14       | $3 \times 3$ | 14      | 14     | $1/2 \times 1/2$ | 31.5 | 31.5      |      | 31.5   | 31.5  | 126  | 14  |
| 7a       | BN       | 17       | 1            | 17      | 17     | $1/2 \times 1/2$ |      | 4.25      | 8.5  | 4.25   | 0     |      |     |
| 7b       | Conv     | 17       | 1            | 14      | 1      | $1/2 \times 1/2$ | 59.5 | 59.5      |      | 59.5   | 59.5  | 238  | 14  |
| 8a       | BN       | 14       | 1            | 14      | 14     | $1/2 \times 1/2$ |      | 3.5       | 7    | 3.5    | 0     |      |     |
| 8b       | Conv     | 14       | $3 \times 3$ | 14      | 14     | $1/2 \times 1/2$ | 31.5 | 31.5      |      | 31.5   | 31.5  | 126  | 14  |
| 9a       | BN       | 14       | 1            | 14      | 14     | $1/2 \times 1/2$ |      | 3.5       | 7    | 3.5    | 0     |      |     |
| 9b       | Conv     | 14       | 1            | 6       | 1      | $1/2 \times 1/2$ | 21   | 21        |      | 21     | 21    | 84   | 0   |
| $\Sigma$ |          |          |              |         |        |                  | 329  | 359.25    | 60.5 | 340.25 | 325.5 | 1302 | 112 |

Table 15. Network structure of [16](#), Y channel. Y channel is shuffled  $2 \times 2 \rightarrow 4$  channels, hence all computations are performed at lower resolution. Output is unshuffled into  $2 \times 2$  again. U/V channels are appended to the input.

| Layer    | Type | Channels | Kernel       | Filters | Groups | Resolution       | F/W | F/W (Trn) | BN | B/W   | Grad. | #W   | #B  |
|----------|------|----------|--------------|---------|--------|------------------|-----|-----------|----|-------|-------|------|-----|
| 1a       | BN   | 6        | 1            | 6       | 6      | $1/2 \times 1/2$ |     | 1.5       | 3  |       | 0     |      |     |
| 1b       | Conv | 6        | 1            | 20      | 1      | $1/2 \times 1/2$ | 30  | 30        |    |       | 30    | 120  | 20  |
| 2a       | BN   | 20       | 1            | 20      | 20     | $1/2 \times 1/2$ |     | 5         | 10 | 5     | 0     |      |     |
| 2b       | Conv | 20       | $3 \times 3$ | 20      | 20     | $1/2 \times 1/2$ | 45  | 45        |    | 45    | 45    | 180  | 20  |
| 3a       | BN   | 20       | 1            | 20      | 20     | $1/2 \times 1/2$ |     | 5         | 10 | 5     | 0     |      |     |
| 3b       | Conv | 20       | 1            | 20      | 1      | $1/2 \times 1/2$ | 100 | 100       |    | 100   | 100   | 400  | 20  |
| 4a       | BN   | 20       | 1            | 20      | 20     | $1/2 \times 1/2$ |     | 5         | 10 | 5     | 0     |      |     |
| 4b       | Conv | 20       | $3 \times 3$ | 20      | 20     | $1/2 \times 1/2$ | 45  | 45        |    | 45    | 45    | 180  | 20  |
| 5a       | BN   | 20       | 1            | 20      | 20     | $1/2 \times 1/2$ |     | 5         | 10 | 5     | 0     |      |     |
| 5b       | Conv | 20       | 1            | 20      | 1      | $1/2 \times 1/2$ | 100 | 100       |    | 100   | 100   | 400  | 20  |
| 6a       | BN   | 20       | 1            | 20      | 20     | $1/2 \times 1/2$ |     | 5         | 10 | 5     | 0     |      |     |
| 6c       | Conv | 20       | $3 \times 3$ | 20      | 20     | $1/2 \times 1/2$ | 45  | 45        |    | 45    | 45    | 180  | 20  |
| 7a       | BN   | 20       | 1            | 20      | 20     | $1/2 \times 1/2$ |     | 3.5       | 7  | 3.5   | 0     |      |     |
| 7b       | Conv | 20       | 1            | 4       | 1      | $1/2 \times 1/2$ | 20  | 20        |    | 20    | 20    | 80   |     |
| $\Sigma$ |      |          |              |         |        |                  | 385 | 415       | 60 | 383.5 | 385   | 1540 | 120 |



Table 16. Network structure of [16], U/V channels. U/V channels are shuffled  $2 \times 2 \rightarrow 4$  channels each, hence all computations are performed at lower resolution. Output is unshuffled into  $2 \times 2$  again.

| Layer    | Type | Channels | Kernel       | Filters | Groups | Resolution       | F/W    | F/W (Trn) | BN   | B/W   | Grad.  | #W   | #B  |
|----------|------|----------|--------------|---------|--------|------------------|--------|-----------|------|-------|--------|------|-----|
| 1a       | BN   | 8        | 1            | 8       | 8      | $1/4 \times 1/4$ |        | 0.5       | 1    | 0     | 0      |      |     |
| 1b       | Conv | 8        | 1            | 20      | 1      | $1/4 \times 1/4$ | 10     | 10        |      | 10    | 10     | 160  | 20  |
| 2a       | BN   | 20       | 1            | 20      | 20     | $1/4 \times 1/4$ |        | 1.25      | 2.5  | 1.25  | 0      |      |     |
| 2b       | Conv | 20       | $3 \times 3$ | 20      | 20     | $1/4 \times 1/4$ | 11.25  | 11.25     |      | 11.25 | 11.25  | 180  | 20  |
| 3a       | BN   | 20       | 1            | 20      | 20     | $1/4 \times 1/4$ |        | 1.25      | 2.5  | 1.25  | 0      |      |     |
| 3b       | Conv | 20       | 1            | 20      | 1      | $1/4 \times 1/4$ | 25     | 25        |      | 25    | 25     | 400  | 20  |
| 4a       | BN   | 20       | 1            | 20      | 20     | $1/4 \times 1/4$ |        | 1.25      | 2.5  | 1.25  | 0      |      |     |
| 4b       | Conv | 20       | $3 \times 3$ | 20      | 20     | $1/4 \times 1/4$ | 11.25  | 11.25     |      | 11.25 | 11.25  | 180  | 20  |
| 5a       | BN   | 20       | 1            | 20      | 20     | $1/4 \times 1/4$ |        | 1.25      | 2.5  | 1.25  | 0      |      |     |
| 5b       | Conv | 20       | 1            | 20      | 1      | $1/4 \times 1/4$ | 25     | 25        |      | 25    | 25     | 400  | 20  |
| 6a       | BN   | 20       | 1            | 20      | 20     | $1/4 \times 1/4$ |        | 1.25      | 2.5  | 1.25  | 0      |      |     |
| 6c       | Conv | 20       | $3 \times 3$ | 20      | 20     | $1/4 \times 1/4$ | 11.25  | 11.25     |      | 11.25 | 11.25  | 180  | 20  |
| 7a       | BN   | 20       | 1            | 20      | 20     | $1/4 \times 1/4$ |        | 3.5       | 7    | 3.5   | 0      |      |     |
| 7b       | Conv | 20       | 1            | 8       | 1      | $1/4 \times 1/4$ | 10     | 10        |      | 10    | 10     | 160  |     |
| $\Sigma$ |      |          |              |         |        |                  | 103.75 | 114       | 20.5 | 103.5 | 103.75 | 1660 | 120 |
